# Supplementary material for: Quest for a New Solver for EPANET 2
Source: Atypon-hosted journal article supplement (doi:10.1061/(asce)wr.1943-5452.0000596), 2015-11-20
Supplement: supplemental_data_wr.1943-5452.0000596_burger.pdf [file supplemental_data_wr.1943-5452.0000596_burger.pdf]

*ASCE Journal of Water Resources Planning and Management*

**The Quest for a New Solver for *EPANET 2***

Gregor Burger, Robert Sitzenfrei, Manfred Kleidorfer, and Wolfgang Rauch

**DOI:** 10.1061/(ASCE)WR.1943-5452.0000596

**Supplemental Data**

Tables S1-S3 contain runtime data for four-neighbor, eight-neighbor, and real-world input systems.

**SUPPLEMENTAL DATA**

Table S1: Runtimes (in Seconds) of the Generated Squared Input Systems with a Four-Neighbor Configuration

| Name       | n       | nnz       | cholmod              | viennacl             | pardiso              | samg | cusparse             | en2                  | hsl                  |
|------------|---------|-----------|----------------------|----------------------|----------------------|------|----------------------|----------------------|----------------------|
| square-010 | 99      | 275       | $3.45 \cdot 10^{-4}$ | $2.39 \cdot 10^{-3}$ | $2.80 \cdot 10^{-2}$ | 0.13 | $7.99 \cdot 10^{-2}$ | $2.56 \cdot 10^{-4}$ | $1.27 \cdot 10^{-3}$ |
| square-013 | 167     | 471       | $6.11 \cdot 10^{-4}$ | $5.01 \cdot 10^{-3}$ | $6.58 \cdot 10^{-3}$ | 0.11 | 0.12                 | $4.76 \cdot 10^{-4}$ | $1.59 \cdot 10^{-3}$ |
| square-016 | 253     | 721       | $9.41 \cdot 10^{-4}$ | $6.89 \cdot 10^{-3}$ | $3.07 \cdot 10^{-3}$ | 0.13 | 0.14                 | $7.33 \cdot 10^{-4}$ | $2.21 \cdot 10^{-3}$ |
| square-020 | 396     | 1,141     | $1.57 \cdot 10^{-3}$ | $9.92 \cdot 10^{-3}$ | $3.62 \cdot 10^{-3}$ | 0.11 | 0.19                 | $1.35 \cdot 10^{-3}$ | $3.34 \cdot 10^{-3}$ |
| square-025 | 618     | 1,791     | $2.86 \cdot 10^{-3}$ | $1.54 \cdot 10^{-2}$ | $4.99 \cdot 10^{-2}$ | 0.14 | 0.22                 | $2.26 \cdot 10^{-3}$ | $4.29 \cdot 10^{-3}$ |
| square-032 | 1,013   | 2,954     | $5.05 \cdot 10^{-3}$ | $2.36 \cdot 10^{-2}$ | $1.10 \cdot 10^{-2}$ | 0.16 | 0.30                 | $3.82 \cdot 10^{-3}$ | $6.96 \cdot 10^{-3}$ |
| square-040 | 1,584   | 4,642     | $8.92 \cdot 10^{-3}$ | $4.65 \cdot 10^{-2}$ | $1.17 \cdot 10^{-2}$ | 0.16 | 0.41                 | $7.78 \cdot 10^{-3}$ | $1.12 \cdot 10^{-2}$ |
| square-050 | 2,475   | 7,276     | $1.66 \cdot 10^{-2}$ | $7.72 \cdot 10^{-2}$ | $1.66 \cdot 10^{-2}$ | 0.17 | 0.53                 | $1.30 \cdot 10^{-2}$ | $1.62 \cdot 10^{-2}$ |
| square-063 | 3,929   | 11,582    | $3.26 \cdot 10^{-2}$ | 0.13                 | $2.49 \cdot 10^{-2}$ | 0.19 | 0.73                 | $2.88 \cdot 10^{-2}$ | $2.81 \cdot 10^{-2}$ |
| square-079 | 6,178   | 18,253    | $6.31 \cdot 10^{-2}$ | 0.19                 | $3.67 \cdot 10^{-2}$ | 0.22 | 1.18                 | $4.81 \cdot 10^{-2}$ | $4.17 \cdot 10^{-2}$ |
| square-100 | 9,900   | 29,313    | 0.11                 | 0.32                 | $5.53 \cdot 10^{-2}$ | 0.23 | 1.84                 | 0.11                 | $6.78 \cdot 10^{-2}$ |
| square-126 | 15,717  | 46,594    | 0.22                 | 0.49                 | $9.70 \cdot 10^{-2}$ | 0.28 | 2.59                 | 0.22                 | 0.12                 |
| square-158 | 24,715  | 73,342    | 0.38                 | 0.71                 | 0.15                 | 0.34 | 3.50                 | 0.35                 | 0.20                 |
| square-200 | 39,601  | 117,616   | 0.78                 | 1.12                 | 0.25                 | 0.39 | 4.46                 | 0.87                 | 0.36                 |
| square-251 | 62,373  | 185,394   | 1.52                 | 2.03                 | 0.40                 | 0.55 | 6.56                 | 1.63                 | 0.64                 |
| square-316 | 98,857  | 293,977   | 3.10                 | 3.80                 | 0.69                 | 0.76 | 9.77                 | 3.68                 | 1.01                 |
| square-398 | 156,827 | 466,590   | 6.05                 | 6.30                 | 1.15                 | 1.11 | 11.90                | 7.92                 | 1.74                 |
| square-501 | 248,504 | 739,586   | 11.38                | 9.83                 | 1.95                 | 1.83 | 16.15                | 15.37                | 3.09                 |
| square-631 | 394,202 | 1,173,539 | 23.23                | 13.80                | 3.19                 | 2.87 | 20.50                | 32.65                | 4.95                 |
| square-794 | 624,164 | 1,858,518 | 49.99                | 23.76                | 5.63                 | 4.74 | 30.92                | 73.66                | 9.19                 |

**SUPPLEMENTAL DATA**

Table S2: Runtimes (in Seconds) of the Generated Squared Input Systems with an Eight-Neighbor Configuration

| Name       | n       | nnz       | cholmod              | viennacl             | pardiso              | samg | cusparse             | en2                  | hsl                  |
|------------|---------|-----------|----------------------|----------------------|----------------------|------|----------------------|----------------------|----------------------|
| square-010 | 99      | 433       | $4.63 \cdot 10^{-4}$ | $2.16 \cdot 10^{-3}$ | $4.01 \cdot 10^{-2}$ | 0.11 | $7.56 \cdot 10^{-2}$ | $3.62 \cdot 10^{-4}$ | $1.71 \cdot 10^{-3}$ |
| square-013 | 167     | 751       | $9.12 \cdot 10^{-4}$ | $3.02 \cdot 10^{-3}$ | $3.98 \cdot 10^{-3}$ | 0.10 | 0.11                 | $6.60 \cdot 10^{-4}$ | $2.16 \cdot 10^{-3}$ |
| square-016 | 253     | 1,162     | $1.46 \cdot 10^{-3}$ | $4.86 \cdot 10^{-3}$ | $2.57 \cdot 10^{-2}$ | 0.15 | 0.13                 | $1.24 \cdot 10^{-3}$ | $2.79 \cdot 10^{-3}$ |
| square-020 | 396     | 1,849     | $3.06 \cdot 10^{-3}$ | $8.92 \cdot 10^{-3}$ | $1.08 \cdot 10^{-2}$ | 0.12 | 0.14                 | $2.20 \cdot 10^{-3}$ | $4.08 \cdot 10^{-3}$ |
| square-025 | 618     | 2,917     | $4.87 \cdot 10^{-3}$ | $1.33 \cdot 10^{-2}$ | $1.54 \cdot 10^{-2}$ | 0.13 | 0.19                 | $4.27 \cdot 10^{-3}$ | $5.83 \cdot 10^{-3}$ |
| square-032 | 1,013   | 4,836     | $9.44 \cdot 10^{-3}$ | $2.65 \cdot 10^{-2}$ | $1.26 \cdot 10^{-2}$ | 0.14 | 0.27                 | $8.65 \cdot 10^{-3}$ | $9.11 \cdot 10^{-3}$ |
| square-040 | 1,584   | 7,631     | $1.72 \cdot 10^{-2}$ | $4.13 \cdot 10^{-2}$ | $1.21 \cdot 10^{-2}$ | 0.17 | 0.35                 | $1.56 \cdot 10^{-2}$ | $1.44 \cdot 10^{-2}$ |
| square-050 | 2,475   | 11,980    | $3.13 \cdot 10^{-2}$ | $7.04 \cdot 10^{-2}$ | $1.90 \cdot 10^{-2}$ | 0.18 | 0.51                 | $2.83 \cdot 10^{-2}$ | $2.04 \cdot 10^{-2}$ |
| square-063 | 3,929   | 19,114    | $5.55 \cdot 10^{-2}$ | 0.11                 | $3.28 \cdot 10^{-2}$ | 0.20 | 0.66                 | $4.95 \cdot 10^{-2}$ | $3.19 \cdot 10^{-2}$ |
| square-079 | 6,180   | 30,189    | 0.11                 | 0.16                 | $4.59 \cdot 10^{-2}$ | 0.21 | 0.99                 | 0.12                 | $6.04 \cdot 10^{-2}$ |
| square-100 | 9,900   | 48,522    | 0.23                 | 0.30                 | $7.84 \cdot 10^{-2}$ | 0.24 | 1.41                 | 0.23                 | 0.10                 |
| square-126 | 15,718  | 77,212    | 0.43                 | 0.48                 | 0.14                 | 0.28 | 2.09                 | 0.51                 | 0.18                 |
| square-158 | 24,714  | 121,648   | 0.84                 | 0.64                 | 0.22                 | 0.32 | 3.12                 | 0.92                 | 0.27                 |
| square-200 | 39,600  | 195,246   | 1.92                 | 1.07                 | 0.36                 | 0.50 | 4.35                 | 2.44                 | 0.54                 |
| square-251 | 62,375  | 307,949   | 3.64                 | 2.11                 | 0.61                 | 0.58 | 6.04                 | 4.40                 | 0.87                 |
| square-316 | 98,866  | 488,556   | 6.35                 | 3.79                 | 1.06                 | 0.81 | 8.22                 | 8.76                 | 1.63                 |
| square-398 | 156,824 | 775,509   | 15.00                | 5.86                 | 1.75                 | 1.32 | 11.13                | 22.17                | 2.53                 |
| square-501 | 248,506 | 1,229,708 | 31.60                | 10.17                | 3.26                 | 2.19 | 15.57                | 47.23                | 5.18                 |
| square-631 | 394,196 | 1,951,573 | 64.16                | 13.73                | 5.44                 | 3.25 | 19.39                | 97.38                | 8.58                 |
| square-794 | 624,160 | 3,091,263 | 55.53                | 26.60                | 9.13                 | 5.40 | 28.09                | 210.92               | 13.92                |

**SUPPLEMENTAL DATA**

Table S3: Runtimes (in Seconds) of the Real-World Input Systems

| Name        | n      | nnz     | cholmod | viennacl | pardiso | samg | cusparse | en2     | hsl     |
|-------------|--------|---------|---------|----------|---------|------|----------|---------|---------|
| 01-towng2   | 127    | 281     | 2.98e-4 | 4.36e-3  | 8.21e-3 | 0.12 | 0.11     | 2.25e-4 | 1.18e-3 |
| 02-bwsn1    | 126    | 287     | 2.90e-4 | 4.09e-3  | 2.73e-2 | 0.13 | 0.13     | 2.05e-4 | 1.20e-3 |
| 03-dtown    | 399    | 850     | 8.08e-4 | 5.74e-2  | 5.77e-3 | 0.14 | 0        | 6.13e-4 | 2.48e-3 |
| 04-towng1   | 453    | 1,040   | 1.07e-3 | 2.57e-2  | 1.34e-2 | 0.12 | 0        | 7.93e-4 | 2.50e-3 |
| 05-townh    | 798    | 1,682   | 1.53e-3 | 2.54e-1  | 5.07e-2 | 0.14 | 0        | 1.19e-3 | 3.99e-3 |
| 06-richmond | 865    | 1,808   | 1.53e-3 | 0        | 7.21e-3 | 0.14 | 0        | 1.03e-3 | 3.69e-3 |
| 07-wolf     | 1,782  | 3,770   | 3.53e-3 | 1.27e-1  | 1.26e-2 | 0.18 | 0.46     | 2.28e-3 | 8.29e-3 |
| 08-exnet    | 1,891  | 4,306   | 4.35e-3 | 5.64e-1  | 1.30e-2 | 0.23 | 1.11     | 2.98e-3 | 8.62e-3 |
| 09-run1911  | 5,118  | 11,865  | 1.27e-2 | 1.87e-1  | 2.25e-2 | 0.20 | 1.04     | 8.76e-3 | 2.16e-2 |
| 10-town     | 7,128  | 14,683  | 1.41e-2 | 0        | 2.58e-2 | 0.29 | 0        | 9.37e-3 | 2.69e-2 |
| 11-bwsn2    | 12,523 | 26,839  | 2.60e-2 | 0        | 4.46e-2 | 0.34 | 0        | 1.75e-2 | 4.82e-2 |
| 11-vibk     | 12,377 | 25,376  | 2.51e-2 | 0        | 4.70e-2 | 0.43 | 0        | 2.01e-2 | 4.37e-2 |
| 12-bwsn2    | 12,523 | 26,839  | 2.61e-2 | 0        | 4.59e-2 | 0.32 | 0        | 1.80e-2 | 4.80e-2 |
| 13-vtirol   | 82,079 | 166,363 | 1.93e-1 | 0        | 2.24e-1 | 1.43 | 0        | 1.36e-1 | 3.48e-1 |
